# Supplementary material for: Effects of Arbuscular Mycorrhization on Fruit Quality in Industrialized Tomato Production
Source: MDPI journal article supplement (doi:10.3390/ijms21197029), 2020-09-24
Supplement: s1 [file s1]

## Supplemental Figure S2

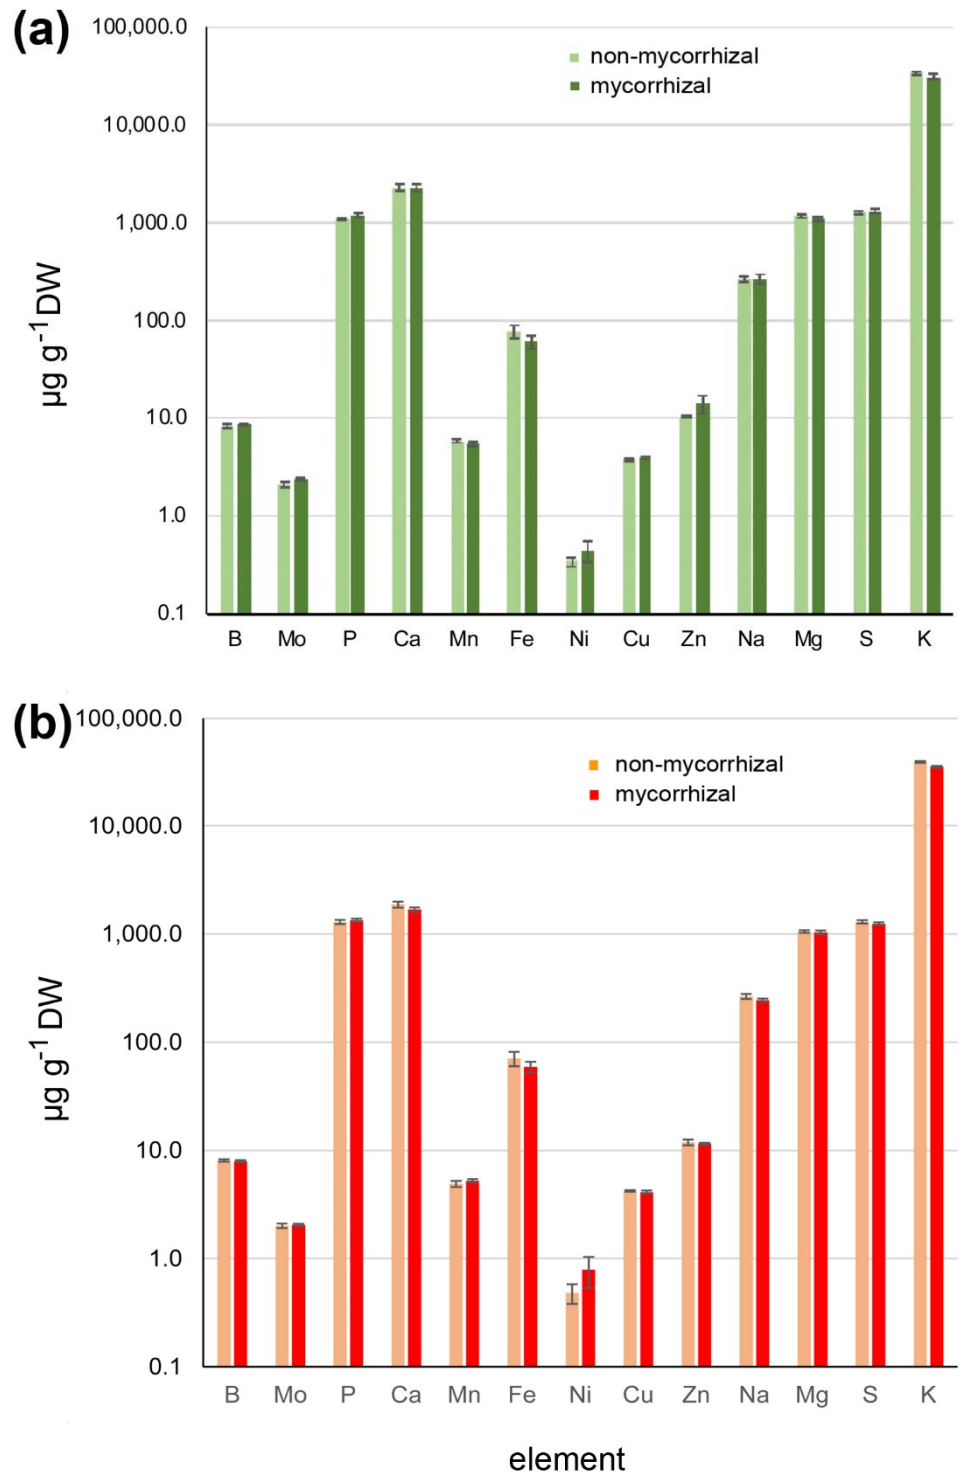

**Fig. S2:** Content of minerals in green (a) and red (b) fruits from non-mycorrhizal and mycorrhizal plants. Note that there is no difference between levels of all minerals determined. Values are given as mean  $\pm$  SE ( $n = 8$ ).
