# Supplementary material for: Effects of Arbuscular Mycorrhization on Fruit Quality in Industrialized Tomato Production
Source: MDPI journal article supplement (doi:10.3390/ijms21197029), 2020-09-24
Supplement: s1 [file s1]

## Supplemental Figure S1

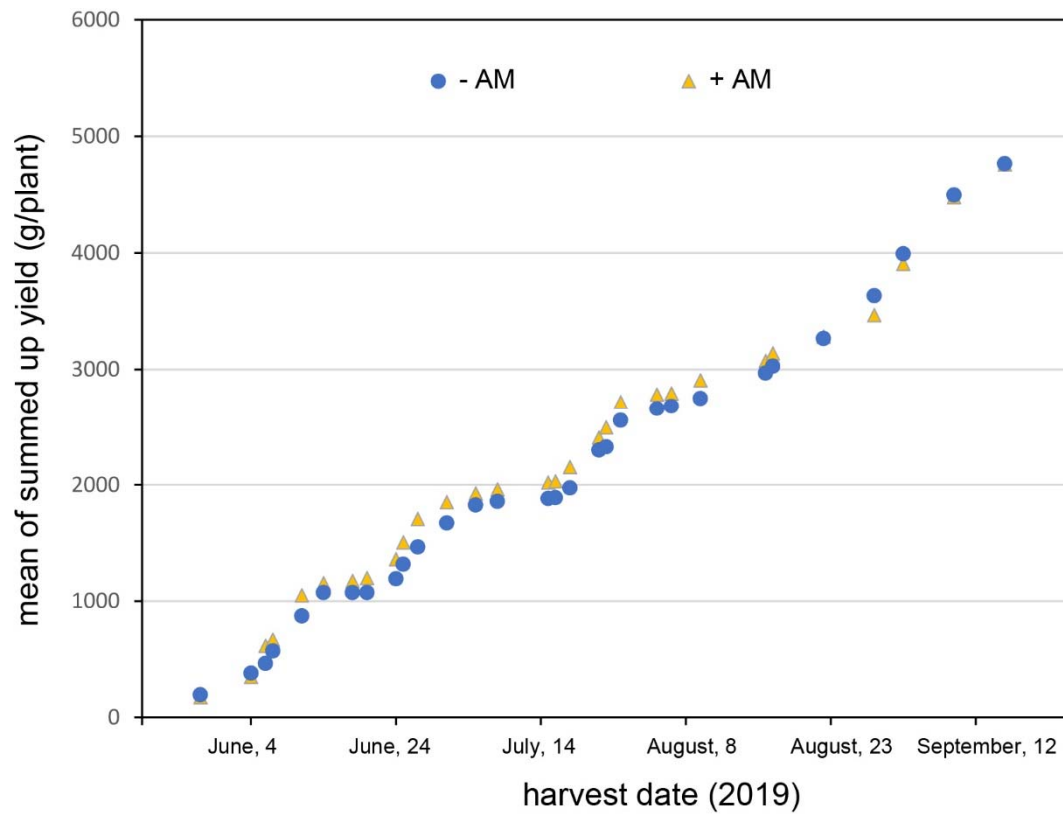

**Fig. S1:** Yield of tomato plants cv. Picolino/Maxifour grown under commercial conditions in greenhouse at INOQ GmbH, 2019. Note that there is no difference between yields from non-mycorrhizal (- AM) and mycorrhizal (+ AM) plants.
